# Supplementary material for: Tumor-Associated Stromal Cellular Density as a Predictor of Recurrence and Mortality in Breast Cancer: Results from Ethnically Diverse Study Populations
Source: Oxford University Press journal article supplement (doi:10.1158/1055-9965.epi-21-0055), 2021-05-05
Supplement: 10559965epi210055-sup-258880_2_supp_7032399_qr3jd7.docx [file 10559965epi210055-sup-258880_2_supp_7032399_qr3jd7.docx]

**Supplementary Table S1:** Study-specific tissue classification cell-detection parameters for the assessment of tumor-associated stromal cellular density on digitized breast cancer hematoxylin and eosin-stained images from three independent study populations

|  | **Script parameters** | | |
| --- | --- | --- | --- |
| **Script features** | **CHCAMS** | **PBCS** | **PLCO** |
| Analysis Magnification | 1.000 | 1.000 | 1.000 |
|  |  |  |  |
| Stain (H&E) |  |  |  |
| R | 0.763 | 0.763 | 0.763 |
| G | 1.045 | 1.045 | 1.045 |
| B | 0.472 | 0.472 | 0.472 |
|  |  |  |  |
| Stain NDW | 0.350 | 0.132 | 0.132 |
|  |  |  |  |
| Nuclear Contrast threshold | 0.520 | 0.520 | 0.520 |
|  |  |  |  |
| Nuclear size (μm) |  |  |  |
| Minimum | 5.000 | 5.000 | 5.000 |
| Maximum | 15.000 | 15.000 | 15.000 |
|  |  |  |  |
| Minimum Nuclear roundness | 0.450 | 0.450 | 0.450 |
|  |  |  |  |
| Nuclear segmentation aggressiveness | 1.000 | 1.000 | 1.000 |
|  |  |  |  |
| Fill Nuclear Holes | True | True | True |
|  |  |  |  |
| Minimum Tissue OD | 0.037 | 0.037 | 0.037 |
|  |  |  |  |
| Classifier | Tissue | Tissue | Tissue |
|  |  |  |  |
| Class | Stroma | Stroma | Stroma |

CHCAMS: Cancer Hospital Chinese Academy of Medical Sciences; PBCS: Polish Breast Cancer Study; PLCO: Prostate, Lung, Colorectal, and Ovarian Cancer screening trial.
